# Supplementary material for: Autochthonous self-assembly of nature's nanomaterials: green, parsimonious and antibacterial carbon nanofilms on glass
Source: Royal Society of Chemistry journal article supplement (doi:10.1039/c6cp03478k), 2016-01-01

**Fig. S1**

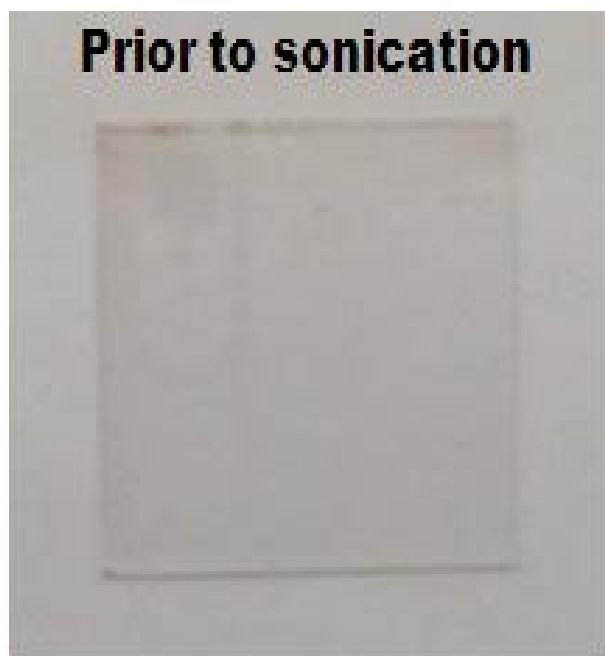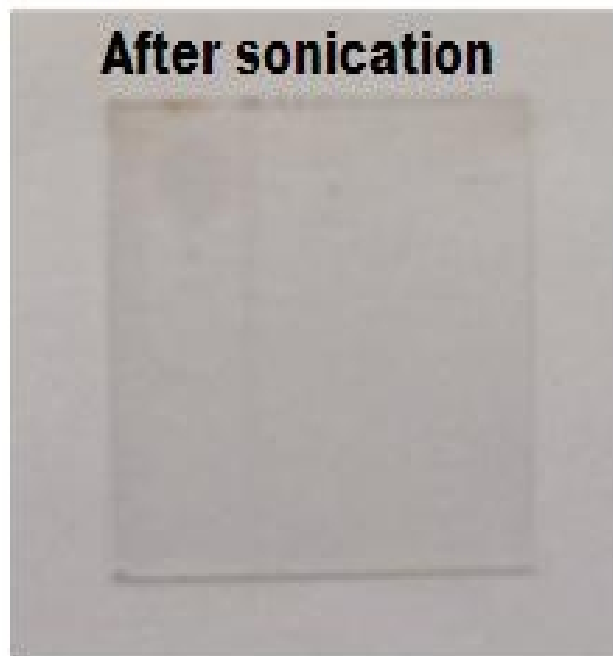

**Fig. S2**

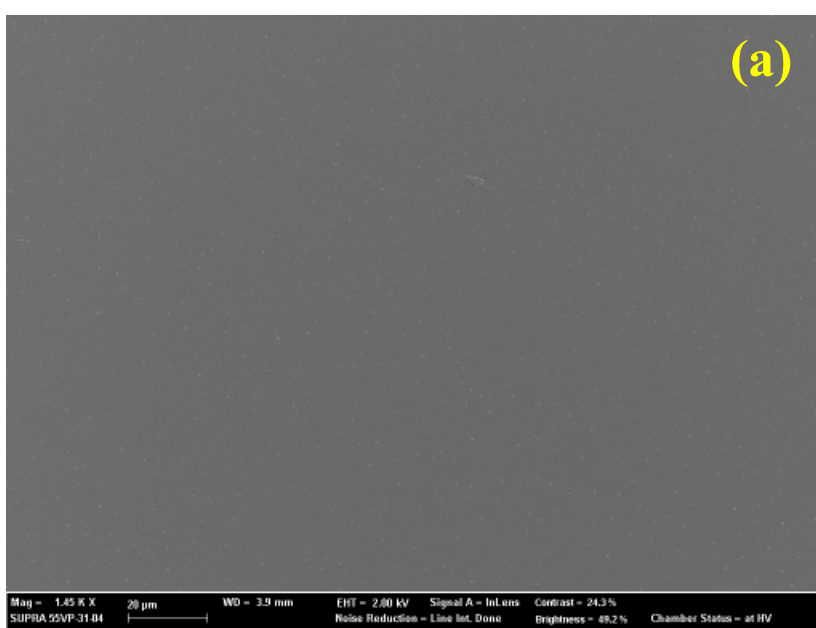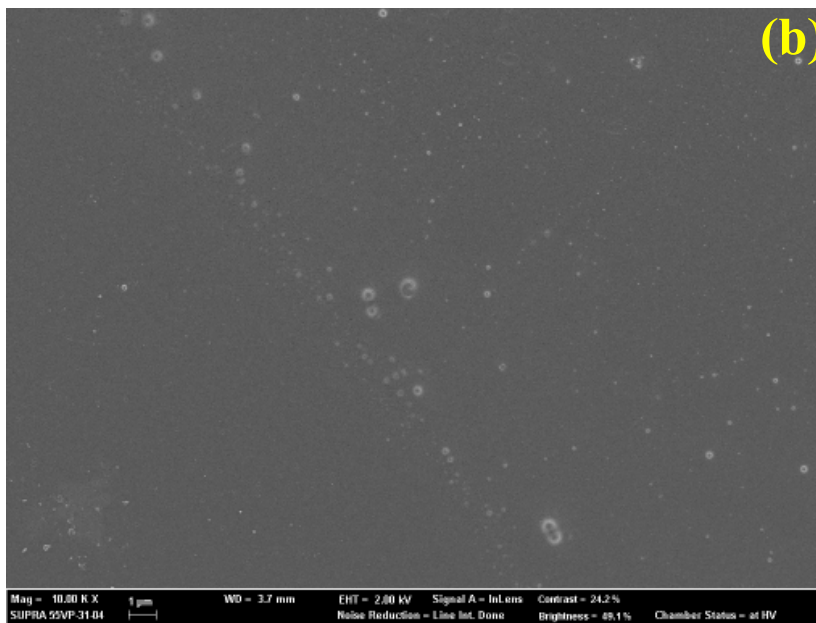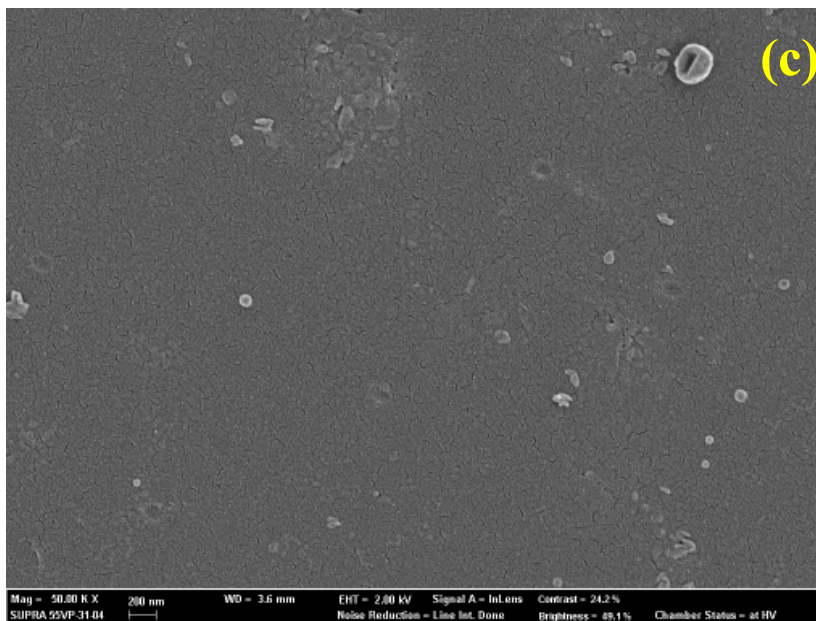

**Fig. S3**

**(a)**

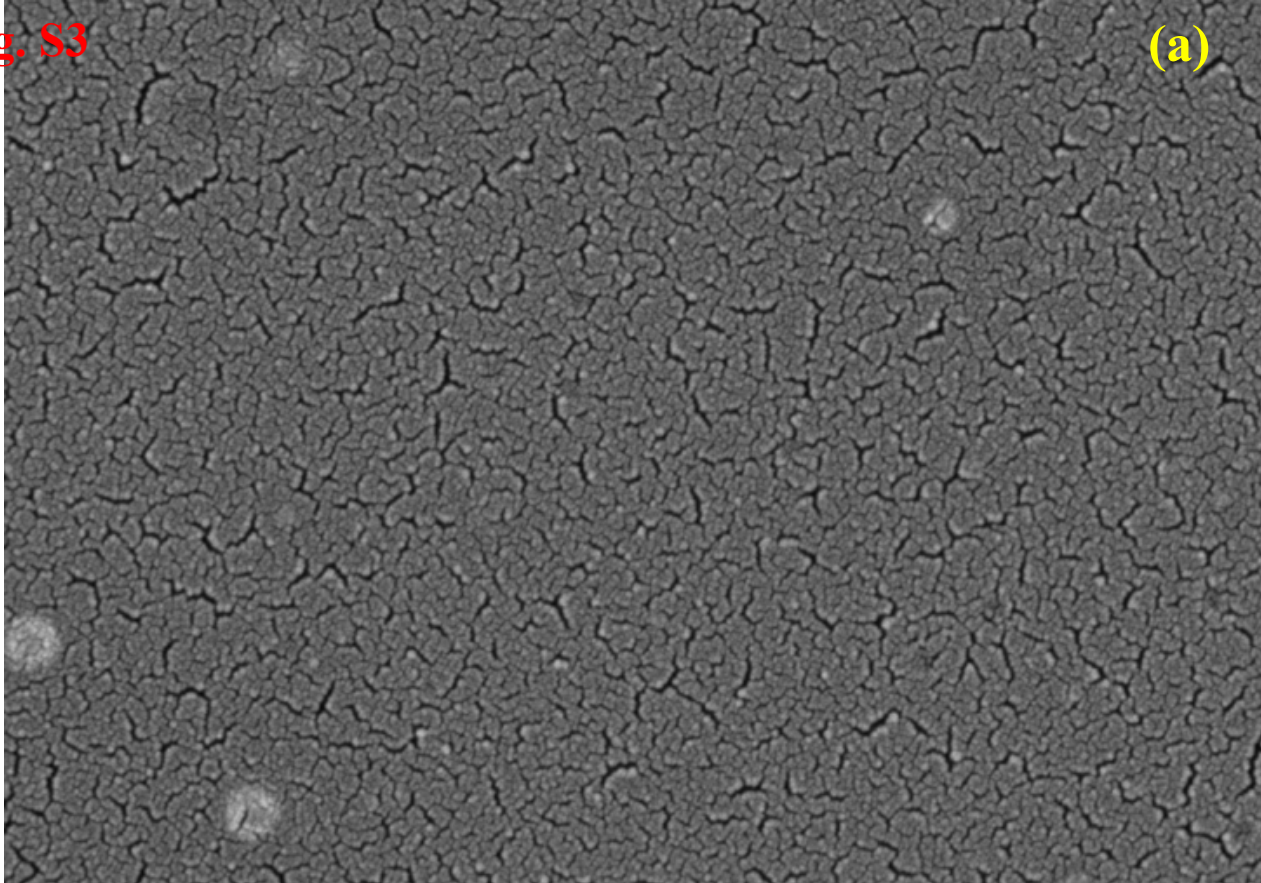

Mag = 150.00 K X    100 nm    WD = 3.7 mm    EHT = 2.00 kV    Signal A = InLens    Contrast = 24.2 %  
SUPRA 55VP 31.04    |————|    Noise Reduction = Line Int. Done    Brightness = 49.1 %    Chamber Status = at HV

**(b)**

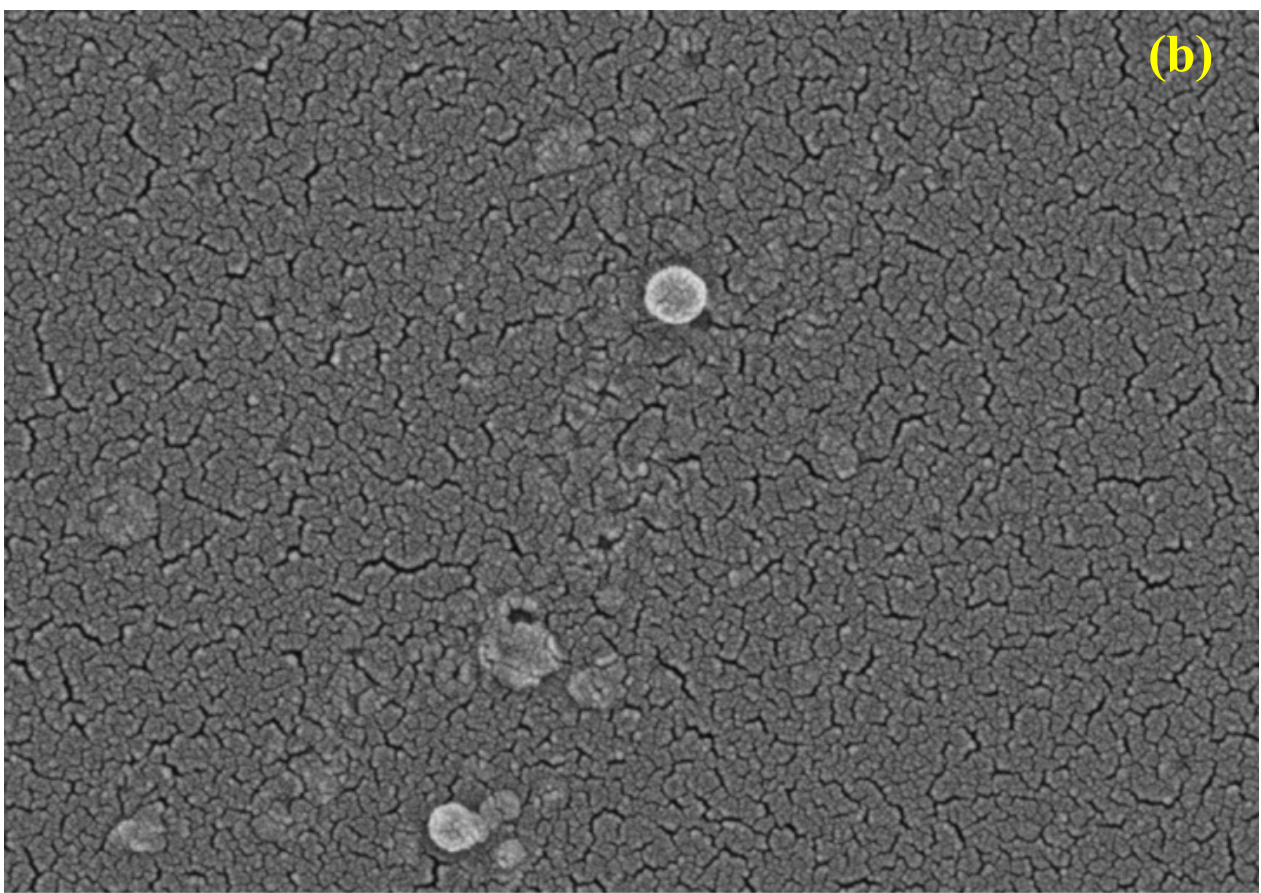

Mag = 150.00 K X    200 nm    WD = 3.7 mm    EHT = 2.00 kV    Signal A = InLens    Contrast = 24.2 %  
SUPRA 55VP 31.04    |————|    Noise Reduction = Line Int. Done    Brightness = 49.1 %    Chamber Status = at HV



Fig. S4

(a)

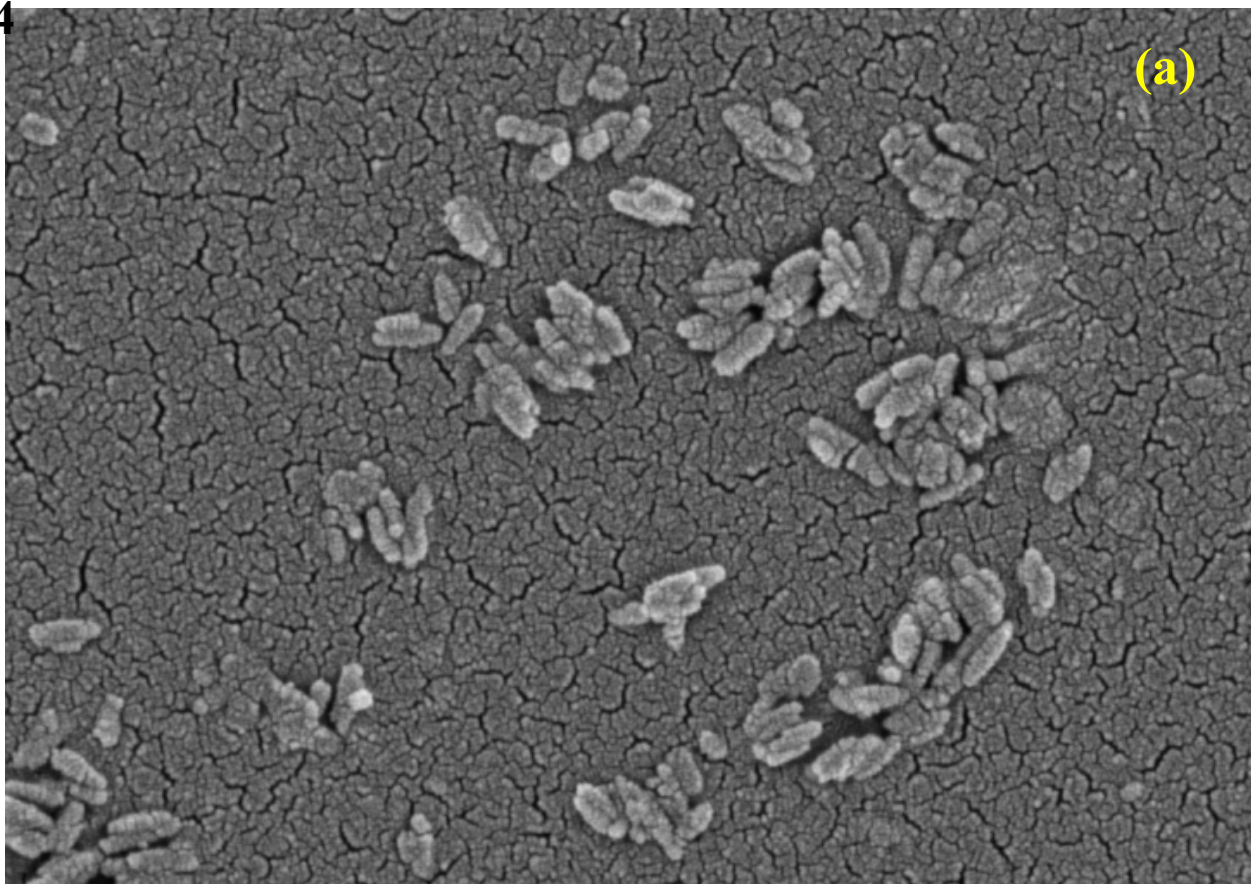

Mag = 150.00 K X    200 nm    WD = 3.6 mm    EHT = 2.00 kV    Signal A = InLens    Contrast = 24.2%  
SUPRA 55VP-31.04    |—————|    Noise Reduction = Line Int. Done    Brightness = 49.1%    Chamber Status = at HV

(b)

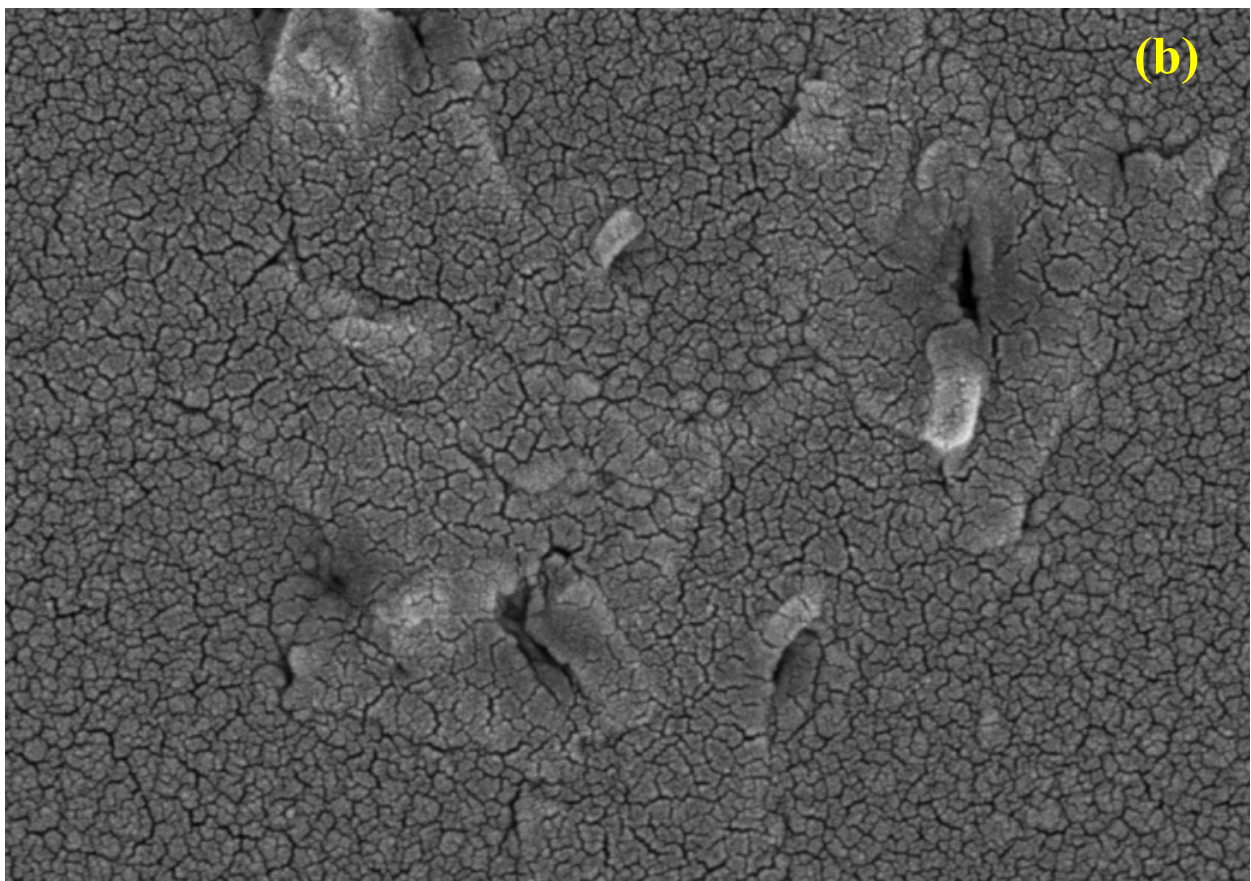

Mag = 150.00 K X    200 nm    WD = 3.7 mm    EHT = 2.00 kV    Signal A = InLens    Contrast = 24.2%  
SUPRA 55VP-31.04    |—————|    Noise Reduction = Line Int. Done    Brightness = 49.1%    Chamber Status = at HV

**Fig. S5**

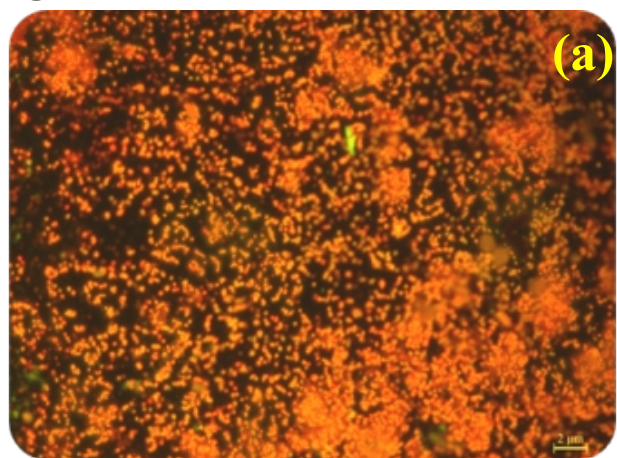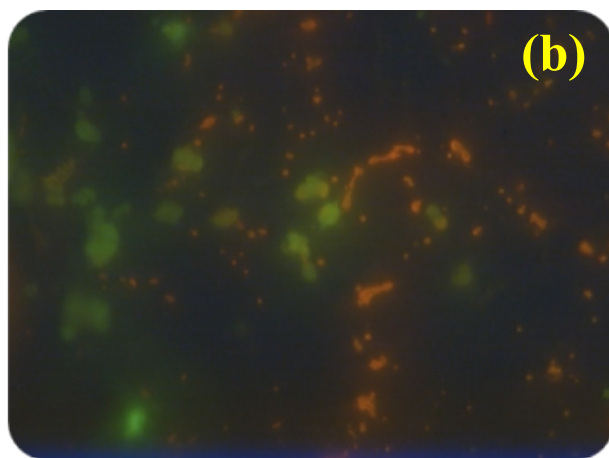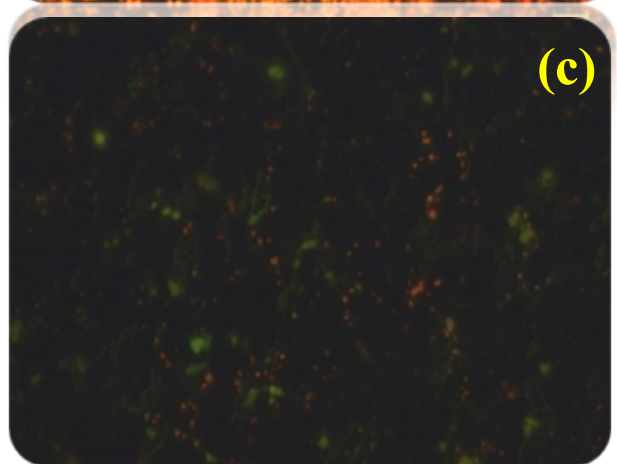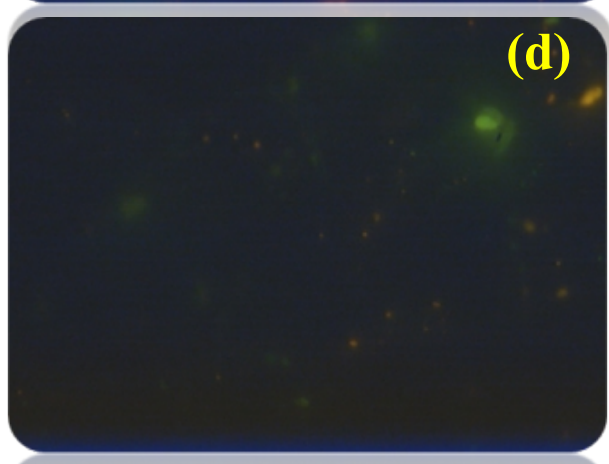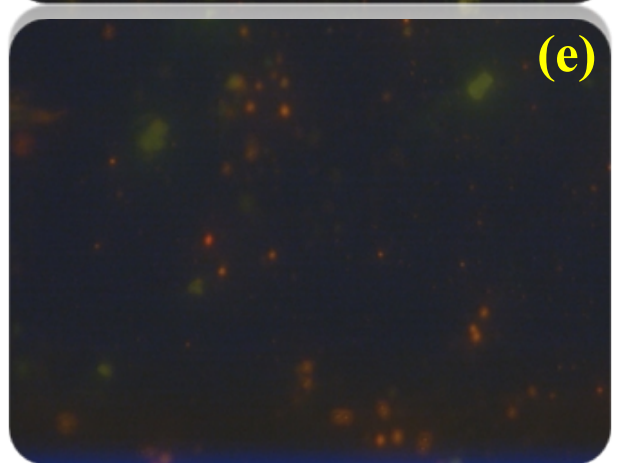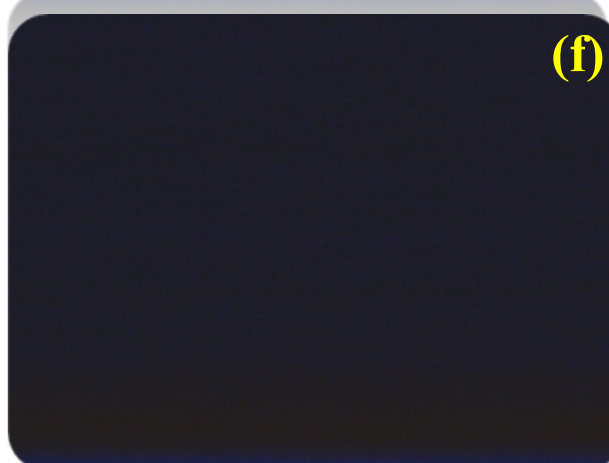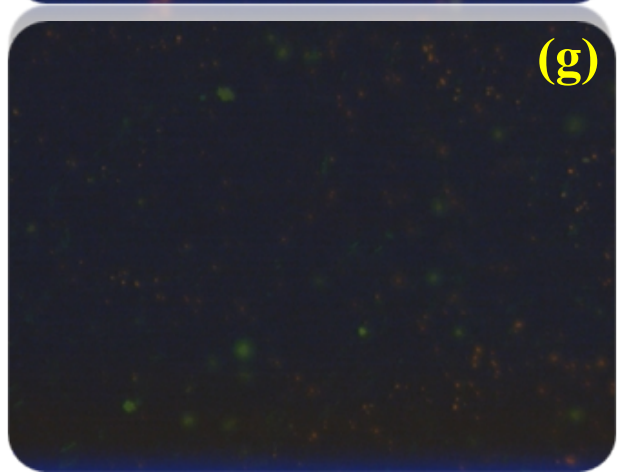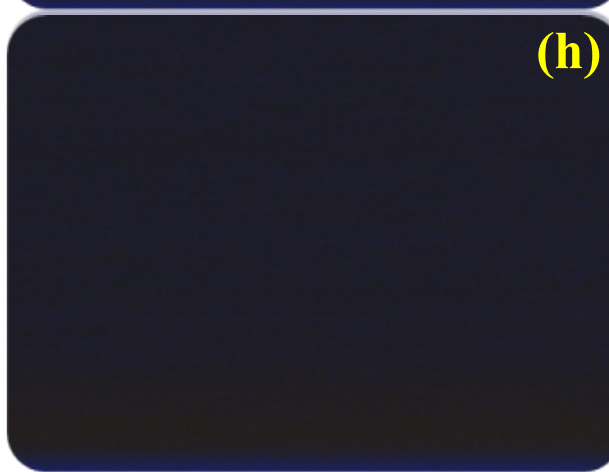



**Fig. S6**

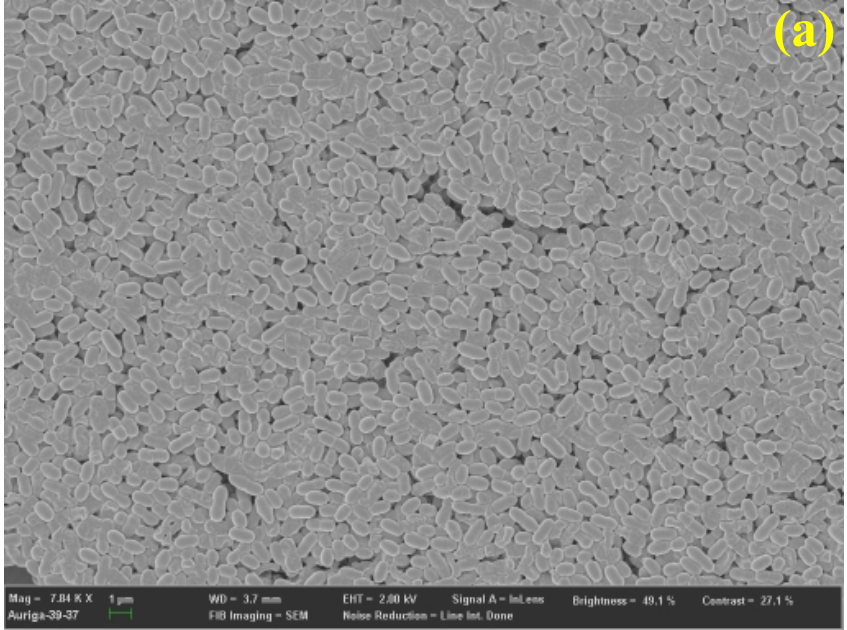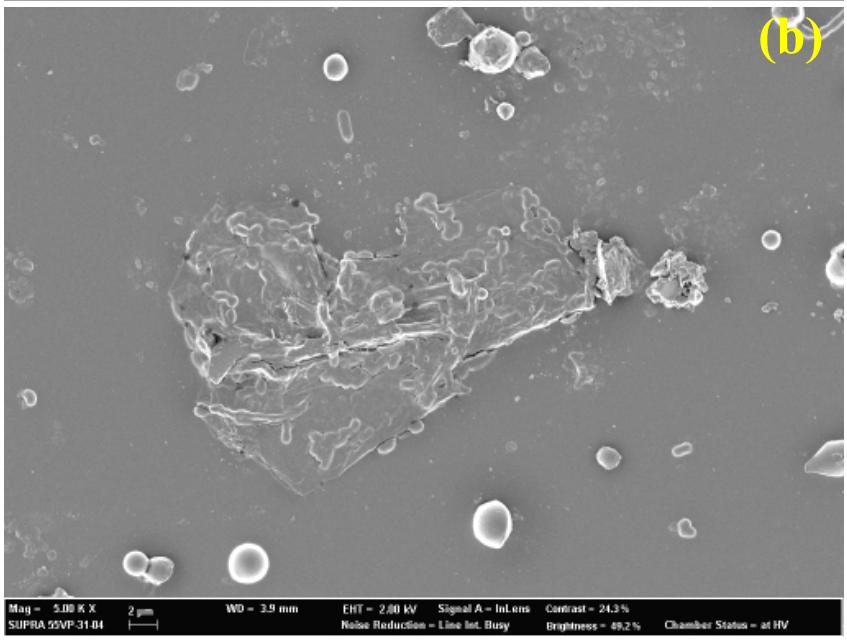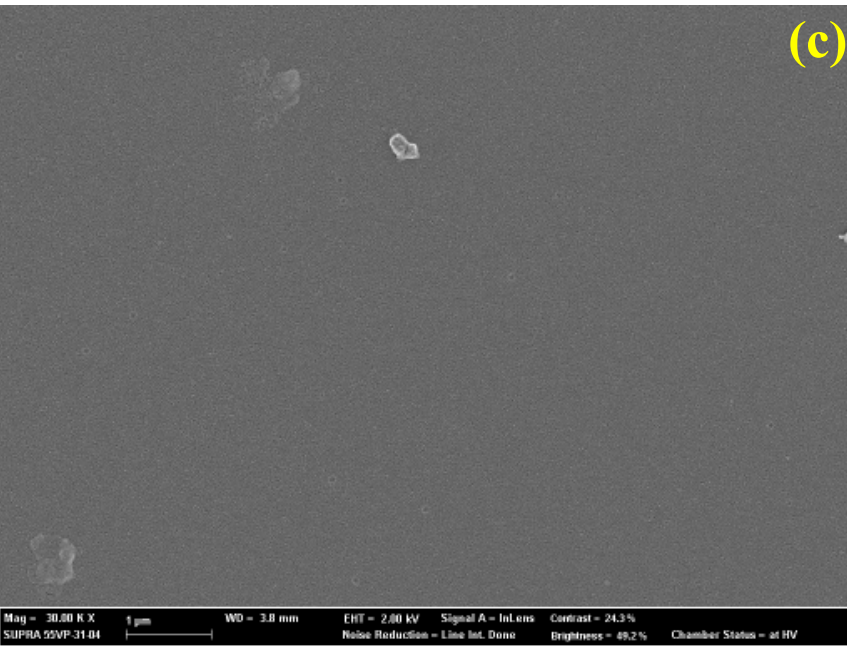

Supplement: c6cp03478k1.pdf [file c6cp03478k1.pdf]
